# Supplementary material
Source: publisher figshare collection journal article supplement (https://frontiersin.figshare.com/ndownloader/files/13319462)
Supplement: Supplementary file [file 13319462]

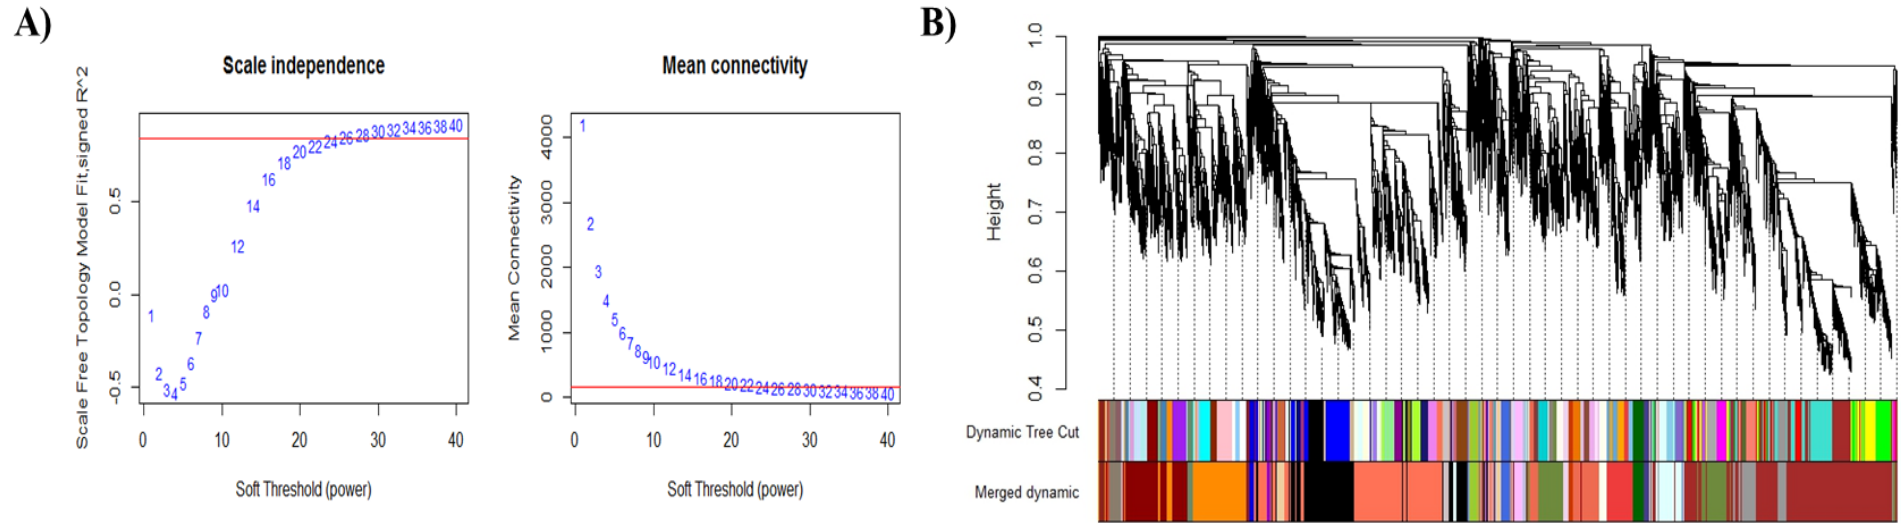

**Figure S2.** Determination of softpower  $\beta$  and dendrogram of modules generated by WGCNA package. **A)** Influence of different softpower  $\beta$  values on the scale independence and mean connectivity of the *T. reesei* network. According to the graphics, power of  $\beta = 26$  ( $R^2 = 0.85$ ) was selected as the soft-thresholding to ensure a scale-free network and maintains a reasonable connectivity between the genes. **B)** Detection of modules by construction of a hierarchical clustering tree using the topological overlap matrix (TOM) as input. Only the modules having more than 85% of pairwise correlation were merged. Each module was assigned to a different color.
